# Supplementary material
Source: PubMed Central journal article supplement (PMC10568442)
Supplement: jamacardiol-e233548-s002.pdf [file jamacardiol-e233548-s002.pdf]

## Data Sharing Statement

Reeskamp. Concordance of a High Lipoprotein(a) Concentration Among Relatives. *JAMA Cardiol.* Published October 11, 2023. doi:10.1001/jamacardio.2023.3548

### Data

**Data available:** No

### Additional Information

**Explanation for why data not available:** For data from the UK Biobank, one must apply for permissions and data access (<https://www.ukbiobank.ac.uk/enable-your-research/apply-for-access>)
